# Supplementary material for: Abnormal hypo-methylation of CAP1 (adenylate cyclase associated protein 1) gene enhances biological characteristics of lung adenocarcinoma cells
Source: Research Square preprint supplement (doi:10.21203/rs.3.rs-2632990/v1), 2023-03-14
Supplement: Supplementary file 1 [file 2200165dccc6c9aad23d7829.docx]

**Table S1**: Clinical and pathological characteristics of LUAD patients

| Patient | Age | Gender | Pathological stage | Tumor size (cm) |
| --- | --- | --- | --- | --- |
| T1  T2  T3  T4  T5  T6 | 48  70  55  65  72  70 | Male  Male  Male  Female  Female  Female | T1N0M0  T1N0M0  T1N0M0  T1N0M0  T1N0M0  T1N0M0 | 2.0  1.3  1.5  2.5  1.8  2.0 |
