# Supplementary material for: Abnormal hypo-methylation of CAP1 (adenylate cyclase associated protein 1) gene enhances biological characteristics of lung adenocarcinoma cells
Source: Research Square preprint supplement (doi:10.21203/rs.3.rs-2632990/v1), 2023-03-14
Supplement: Supplementary file 2 [file 4a58ec5d175dd610a40e9231.docx]

**Table S5**: Immunohistochemical analysis of CAP1 in cancerous and para-carcinoma tissues of early stage LUAD

| Classification | CAP1 immunohistochemistry, n | | | | | | total | *P* value a |
| --- | --- | --- | --- | --- | --- | --- | --- | --- |
| negative | weakly positive | | medium positive | strong positive | |
| cancerous  para-carcinoma | 0  0 | | 0  6 | 2  0 | | 4  0 | 6  6 | 0.002 |

**Notes**: a: Non-parametric test; *P* < 0.05 was statistically significant.
