# Supplementary material for: Abnormal hypo-methylation of CAP1 (adenylate cyclase associated protein 1) gene enhances biological characteristics of lung adenocarcinoma cells
Source: Research Square preprint supplement (doi:10.21203/rs.3.rs-2632990/v1), 2023-03-14
Supplement: Supplementary file 3 [file 9bdaf3132022efcd92d7e75d.docx]

**Table S2**: Primers for PCR, qPCR, sgRNA, MSP and Massarray sequence.

| Primes | 5’-3’ sequence |
| --- | --- |
| **Primers for PCR**  CAP1- forward  CAP1- reverse  GAPDH-forward  GAPDH-reverse  dCas9-DNMT3a-forward  dCas9-DNMT3a- reverse  lentiCas9-Blast- forward  lentiCas9-Blast- reverse  **Primers for qPCR**  CAP1- forward  CAP1- reverse  GAPDH-forward  GAPDH-reverse  **Primers for MSP**  CAP1- forward (M)  CAP1- reverse (U)  **Primers for MassArray**  CAP1- forward (island 1)  CAP1- reverse (island 1)  CAP1- forward (island 2)  CAP1- reverse (island 2)  **sgRNA**  sgCAP1-1-forward  sgCAP1-1-reverse  sgCAP1-2-forward  sgCAP1-2-reverse  sgCAP1-3-forward  sgCAP1-3-reverse  sgCAP1-4-forward  sgCAP1-4-reverse  sgCAP1-5-forward  sgCAP1-5-reverse | TCACAGAACACACCGACCAA  CTCACCTCAGAGTTCCGCCT  CTCAGACACCATGGGGAAGGTGA  ATGATCTTGAGGCTGTTGTCATA  CCGGTGCCCGTCAGTGGCCTCCGCGCCGGGTTTTG  AGAGAAGTTTGTTGCCACACACGCAAAATAC  GCAACAAACTTCTC  ACTGACGGGCACCGGAG  CCTTCAAAAGCAGGAGCAGC  GCATGTTTCTGCACGTCTCC  AGGTCGGAGTCAACGGATTT  TGGAATTTGCCATGGGTGGA  TTATTTTCGGGGATTATATTTTGC  ACCCCACTTCCTATTTAATCGAT  aggaagagag GGGTGTAGGATTTGTTTTAATTTTG  cagtaatacgactcactatagggagaaggctCCAATTCCTCTATCAATTTAATCTCA  aggaagagag GGTTTTTATAGAGGGTATTTGGGAA  cagtaatacgactcactatagggagaaggctTTAACCAAAAACTTCTACCCTTCCT  CACCGGGGACCACACCCTGCGCGCC  AAACGGCGCGCAGGGTGTGGTCCCC  CACCGTGGGAGGACTTGCGGAGACT  AAACAGTCTCCGCAAGTCCTCCCAC  CACCGCTTTACGGACTGCAGCTTAA  AAACTTAAGCTGCAGTCCGTAAAGC  CACCGGGGAAAGAGCCCCGCCCTCA  AAACTGAGGGCGGGGCTCTTTCCCC  CACCGTCTCCGCGCGACCCACTTCC  AAACGGAAGTGGGTCGCGCGGAGAC |
