# Supplementary material for: Abnormal hypo-methylation of CAP1 (adenylate cyclase associated protein 1) gene enhances biological characteristics of lung adenocarcinoma cells
Source: Research Square preprint supplement (doi:10.21203/rs.3.rs-2632990/v1), 2023-03-14
Supplement: Supplementary file 4 [file ce28e1ac18c5afc6b35e45ea.doc]

**Table S4**: The core sequence and CpG islands information of *CAP1* promoter

gtaacctcccctgaacCGagtagcagcCGcctgagcccacccagccctgggCGaggctgcctcagaagcCGgatttcagcagagtgggtgcaggatctgctttaattctgctcatcttattctCGgggaccacaccctgCGCGcCGggaggaagggctccaaaaccacagggCGgaggcttcCGCGCGgccccagacttgaccatctatggtcacagaacacacCGaccaaacaggaagtggggtgagagCGgagggttccctaccttcccagcccCGCGactgccagcCGggctggggctgacccacCGCGccctcactgacccccaCGccctgCGcccagtctcCGcaagtcctcccacaacaatgtccagactaattgccttcccaCGtcacaaaCGgggaaacCGaggtatgcaCGcccagagacaggCGgagCGtggcctCGatcaccacCGagagctgaCGgcCGccCGgattccCGccctcagagaatcctggcccccagtCGttccaagaccctttaCGgactgcagcttaaaggaacCGgcctctgccattgagaccaaactgacagaggaactggtcactcttctgttctttccagagaggagcttagccagggacttctgcccttcctgggccCGggcctCGggggCGattcCGggtaggtaaagCGgaaCGagggCGtggcctctcttgtgagccCGccctcccCGtgtCGctccCGccttgagggCGgggctctttcccaagtgccctctgtgagagcCGggcCGctctctcCGgggCGtggCGaagaggggCGgagtcaCGagCGgggCGgtgagacttcctgcccagtCGCGggccagcctagCGcttcagcCGgCGgctcatttcCGgtgggggCGcCGCGcccagtgagggccCGgaagtgggtCGCGCGgagattgctgggCGgttcttgcCGgaagCGgagagCGgctgatCGcagtcCGgaggtgaggCGgaactctgaggtgagggtgtg
