# Supplementary material for: Abnormal hypo-methylation of CAP1 (adenylate cyclase associated protein 1) gene enhances biological characteristics of lung adenocarcinoma cells
Source: Research Square preprint supplement (doi:10.21203/rs.3.rs-2632990/v1), 2023-03-14
Supplement: Supplementary file 5 [file dedfd745cb2f5c258938ce47.docx]

**Table S3**: Antibodies list.

| Name | Company | Number |
| --- | --- | --- |
| CAP1  GAPDH  Actin  Bax  Bcl-2  Cofilin  Caspase-3  Cleaved Caspase-3  Goat Anti-Rabbit IgG H&L (HRP)  Goat Anti-Mouse IgG H&L (HRP) | Abcam  Abcam  Abcam  Abcam  Abcam  Abcam  Abcam  Abcam  Abcam  Abcam | ab155079  ab8245  ab124964  ab32503  ab32124  ab283500  ab32351  ab2302  ab150077  ab6789 |
